# Supplementary material
Source: PubMed Central journal article supplement (PMC4505224)
Supplement: AAC.00150-15_zac008154222so1.pdf [file AAC.00150-15_zac008154222so1.pdf]

| <b>Ethambutol<br/>resistance<br/>phenotype</b> | <b>Nb of<br/>isolates</b> | <b>Phylogenetic<br/>lineage</b> | <b>Treatment<br/>history<sup>a</sup></b> | <b>Country of<br/>birth<sup>b</sup></b> | <b>Resistance patterns<sup>c</sup></b> |
|------------------------------------------------|---------------------------|---------------------------------|------------------------------------------|-----------------------------------------|----------------------------------------|
| S<br>(n=60)                                    | 3                         | T                               | 0                                        | NA                                      | H, S                                   |
|                                                |                           |                                 | NA                                       | NA                                      | -                                      |
|                                                | 2                         | T1                              | 0                                        | Angola                                  | R, H                                   |
|                                                |                           |                                 | NA                                       | Morocco                                 | -                                      |
|                                                | 3                         | Cameroon                        | 0                                        | France                                  | -                                      |
|                                                |                           |                                 | 0                                        | NA                                      | R, H                                   |
|                                                | 7                         | LAM                             | NA                                       | India                                   | -                                      |
|                                                |                           |                                 | NA                                       | Moldova                                 | -                                      |
|                                                |                           |                                 | 1                                        | Portugal                                | R, H, S                                |
|                                                |                           |                                 | NA                                       | Ivory Coast                             | H, S                                   |
|                                                |                           |                                 | 0                                        | Benin                                   | H, S                                   |
|                                                |                           |                                 | NA                                       | Morocco                                 | -                                      |
|                                                |                           |                                 | 1                                        | Morocco                                 | -                                      |
|                                                | 1                         | Ural                            | 1                                        | NA                                      | -                                      |
|                                                |                           |                                 | 1                                        | R Congo                                 | -                                      |
|                                                | 1                         | S                               | 1                                        | Green Cape                              | R, H                                   |
|                                                | 3                         | Uganda                          | 1                                        | Algeria                                 | R, H, S                                |
|                                                |                           |                                 | 0                                        | R Congo                                 | R, H                                   |
|                                                |                           |                                 | NA                                       | Ivory Coast                             | H                                      |
|                                                | 1                         | S                               | NA                                       | Tunisia                                 | -                                      |
|                                                |                           |                                 | 0                                        | Pakistan                                | R, H, Ofx                              |
|                                                | 1                         | LAM                             | 1                                        | Senegal                                 | H                                      |
|                                                | 10                        | Beijing                         | 0                                        | Madagascar                              | R                                      |
| 0                                              |                           |                                 | Moldova                                  | R, H, S                                 |                                        |
| 0                                              |                           |                                 | Algeria                                  | H, S                                    |                                        |
| 1                                              |                           |                                 | Vietnam                                  | H, S                                    |                                        |
| NA                                             |                           |                                 | NA                                       | -                                       |                                        |
| 0                                              |                           |                                 | France                                   | -                                       |                                        |

|    |                  |    |             |              |
|----|------------------|----|-------------|--------------|
|    |                  | NA | NA          | -            |
|    |                  | NA | Madagascar  | R            |
|    |                  | 0  | China       | R            |
|    |                  | NA | Chechnya    | H, S         |
| 1  | Beijing          | NA | NA          | -            |
| 14 | Haarlem          | 1  | NA          | R            |
|    |                  | NA | NA          | R            |
|    |                  | 0  | Haiti       | -            |
|    |                  | 1  | Romania     | H, S         |
|    |                  | 0  | Madagascar  | -            |
|    |                  | 1  | France      | R, H         |
|    |                  | 0  | France      | -            |
|    |                  | NA | NA          | -            |
|    |                  | 0  | France      | -            |
|    |                  | 0  | Romania     | S            |
|    |                  | NA | NA          | -            |
|    |                  | NA | Sudan       | -            |
|    |                  | NA | Cameroon    | -            |
|    |                  | 0  | Senegal     | -            |
| 2  | Ghana            | 0  | Ivory Coast | R, H, S, Ofx |
|    |                  | 1  | Ivory Coast | R, H         |
| 2  | T3 variant       | 0  | Angola      | R, H         |
|    |                  | 0  | R Congo     | R, H         |
| 1  | T3 variant       | 1  | Angola      | R, H         |
| 1  | T2               | NA | France      | -            |
| 1  | X                | 0  | Cameroon    | R, H, S      |
| 1  | Haarlem          | 0  | France      | -            |
| 2  | Delhi/CAS        | NA | Turkey      | -            |
|    |                  | NA | Pakistan    | -            |
| 1  | Cameroon         | 0  | Senegal     | R, H, S      |
| 1  | West africanum 2 | 0  | Guinea      | -            |
| 1  | <i>M. bovis</i>  | 0  | Mali        | -            |

---

|             |    |             |           |                |                          |
|-------------|----|-------------|-----------|----------------|--------------------------|
| R<br>(n=71) | 3  | Beijing     | 0         | China          | R, H, S                  |
|             |    |             | 1         | Tibet          | R, H, S                  |
|             |    |             | 0         | Tibet          | R, H, S                  |
|             | 14 | Beijing     | NA        | Portugal       | R, H, Ofx, Km, Am, Cm    |
|             |    |             | 1         | Georgia        | R, H, S, Km              |
|             |    |             | 0         | Georgia        | R, H, Ofx                |
|             |    |             | 1         | Georgia        | R, H, S, Ofx             |
|             |    |             | 0         | Ukraine        | R, H, S                  |
|             |    |             | 1         | Georgia        | R, H, S, Ofx, Km, Am, Cm |
|             |    |             | 1         | NA             | R, H, S, Km, Am, Cm      |
|             |    |             | 1         | France         | R, H, S                  |
|             |    |             | 0         | Mongolia       | R, H, S                  |
|             |    |             | 0         | Russia         | R, H, S                  |
|             |    |             | 0         | Tibet          | R, H, S                  |
|             |    |             | 1         | Russia         | R, H, S, Km, Am, Cm      |
|             |    |             | 0         | China          | R                        |
|             |    |             | 0         | Mongolia       | R, H, S                  |
|             | 1  | Chechnya    | R, H, Ofx |                |                          |
|             | 3  | LAM         | 0         | Vietnam        | H, S                     |
|             |    |             | 0         | DR Congo       | R, H, S                  |
|             | 5  | Beijing     | 0         | Central Africa | R, H, S                  |
|             |    |             | 0         | Peru           | H, S                     |
|             |    |             | 0         | Chad           | R, H                     |
|             |    |             | 0         | Sudan          | R, H, S                  |
|             |    |             | 1         | Georgia        | R, H, S, Km              |
|             |    |             | 0         | Chechnya       | R, H, S, Km, Am, Cm      |
|             |    |             | 0         | Georgia        | R, H, S, Km              |
|             |    |             | 0         | Georgia        | R, H, S, Ofx             |
|             |    |             | 1         | China          | R, H, S, Km, Am, Cm      |
|             |    |             | 3         | Haarlem        | 0                        |
|             | 1  | Ivory Coast |           |                | R, H, S                  |
|             | 1  | Tunisia     |           |                | R, H                     |

|                |           |    |             |                      |
|----------------|-----------|----|-------------|----------------------|
| 1              | T1        | 1  | France      | R, H                 |
| 1              | T2        | 1  | Cameroon    | R, H, S              |
| 5              | LAM       | 1  | Georgia     | R, H, S, Ofx         |
|                |           | 0  | Moldova     | R, H, S              |
|                |           | 0  | DR Congo    | R, H                 |
|                |           | 1  | Peru        | R, H, S              |
|                |           | 0  | Morocco     | R, H, S              |
| 1              | Ghana     | 1  | France      | R, H, S              |
| 1              | Beijing   | 0  | West Indies | R, H, S              |
| 1              | Beijing   | 1  | Azerbaijan  | R, H, S, Ofx         |
| 1              | LAM       | 1  | Georgia     | R, H, S              |
| 1              | Haarlem   | 1  | NA          | R, H                 |
| 3              | Beijing   | 0  | Russia      | R, H                 |
|                |           | 0  | France      | R, H, S, Ofx         |
|                |           | 0  | DR Congo    | R, H, S, Km, Am, Cm  |
| 1              | LAM       | 0  | Georgia     | R, H, S, Ofx, Cm     |
| 1              | Beijing   | 1  | Georgia     | R, H, S, Ofx, Km, Cm |
| 1              | Cameroon  | 0  | Benin       | R, H                 |
| 1              | Ural      | 1  | Russia      | R, H, S              |
| 1              | Beijing   | 1  | Ukraine     | R, H, S, Ofx, Km     |
| 1              | Ural      | 1  | Russia      | R, H, S, Km, Am, Cm  |
| 1              | Beijing   | 0  | Chechnya    | R, H, Km, Am, Cm     |
| 1              | Ural      | 0  | France      | R, H                 |
| 3 <sup>d</sup> | Beijing   | 0  | Armenia     | R, H, S              |
|                |           | 0  | Armenia     | R, H, S              |
|                |           | 0  | Armenia     | R, H, S              |
| 1              | X         | 1  | Georgia     | R, H, S              |
| 1              | Beijing   | NA | Armenia     | R, H, S, Ofx, Km     |
| 1              | Beijing   | 0  | Chechnya    | R, H, S              |
| 1              | LAM       | 1  | Georgia     | R, H, S, Ofx, Km     |
| 1              | Beijing   | 1  | Armenia     | R, H, S, Km          |
| 1              | Delhi/CAS | NA | Georgia     | R, H, Ofx            |

|                |         |    |         |                          |
|----------------|---------|----|---------|--------------------------|
| 1              | Beijing | 1  | Armenia | R, H, S, Ofx             |
| 3 <sup>d</sup> | Beijing | 0  | Georgia | R, H, S, Ofx, Km, Cm     |
|                |         | 1  | Georgia | R, H, S, Ofx, Km, Am, Cm |
|                |         | 1  | Russia  | R, H, S, Ofx             |
| 1              | Haarlem | 1  | Romania | R, H, Km, Am, Cm         |
| 1              | Uganda  | NA | Croatia | R, H, S                  |
| 1              | NEW-1   | 0  | China   | R, H, S                  |

**TABLE S1** Molecular and epidemiological characteristics of the 60 ETB-S and 71 ETB-R isolates of MTBC

<sup>a</sup> 0 = no treatment history, 1 = treatment history, ? = unknown, NA = not available

<sup>b</sup> R Congo = Republic of the Congo, DR Congo = Democratic Republic of the Congo, NA = not available

<sup>c</sup> Antibiotics: R = rifampicin, H = isoniazid, S = streptomycin, Ofx = ofloxacin, Km = kanamycin, Am = amikacin, Cm = capreomycin, - = no associated resistance

<sup>d</sup> Isolates sharing identical MIRU codes and spoligotypes

| Resistance gene                       | Primer <sup>a</sup>        | Sequence (5'→3')              | Hybridization temperature (°C) | PCR product size (bp) | Reference or source |
|---------------------------------------|----------------------------|-------------------------------|--------------------------------|-----------------------|---------------------|
| <i>embC</i><br>(Rv3793)               | embC1F                     | CCC AAC CAG CCC AAT GTT C     | 64,5                           | 880                   | 16, 20              |
|                                       | embC1R                     | GGC GGT GTC CAG GAT GTG       |                                |                       |                     |
|                                       | embC2F                     | GCT GCA CAT CCT GGA CAC       | 60                             | 914                   | 16, 20              |
|                                       | embC2R                     | ACG ACA TTG CCA CCG ATA C     |                                |                       |                     |
|                                       | embC3.1F                   | GTA TCG GTG GCA ATG TCG T     | 60                             | 623                   | 16                  |
|                                       | embC3.1R                   | CAG CCC GCA GGT CTT GCC       |                                |                       |                     |
| embC3.2F                              | GTA CCC GGC GTG GTC GGT TG | 60                            | 622                            | this study            |                     |
| embC3.2R                              | CGG GAT GGC GGA CAG TGG T  |                               |                                |                       |                     |
| intergenic region<br><i>embC-embA</i> | <i>embC4F</i>              | ACC ACT GTC CGC CAT CCC G     | 67                             | 635                   | 16, 20              |
|                                       | <i>embC4R</i>              | GAC GAC GGC TGC TAG GCG TG    |                                |                       |                     |
| <i>embA</i><br>(Rv3794)               | embA1F                     | GTG ACT CGC AGC GGG CTG TG    | 68                             | 1223                  | 16, 20              |
|                                       | embA1R                     | CGG TGA ACA CAG CGA CCC GG    |                                |                       |                     |
|                                       | embA2F'                    | CGG CGT TGT CGC TGA TCA CC    | 60                             | 800                   | this study          |
|                                       | embA2R                     | TCA GGT TGG CCT TGG CGG TG    |                                |                       |                     |
| <i>embA-embB</i>                      | embAB F                    | CTG GTG GTC GCG GTG ATC AT    | 64                             | 907                   | 16, 20              |
|                                       | embAB 2F                   | ACG GTC GCT GGC AGG GGA AGT T |                                |                       |                     |
|                                       | embAB 2R                   | CGC CTA TGA CCC GAA CCT GAG   | 60                             | 787                   | 20                  |
|                                       | embAB R                    | AAT TGG CGT CCT TGC CTT       |                                |                       |                     |
| <i>embB</i><br>(Rv3795)               | <i>embB1F</i>              | GGT GCG CGC CAT GCC ACC       | 68                             | 803                   | 16                  |
|                                       | <i>embB1R</i>              | GGT CTG GCA GGC GCA TCC       |                                |                       |                     |
|                                       | <i>embB2g</i>              | CTT CGG CTG GTA TTA CAA CCT G | 60                             | 812                   | this study          |
|                                       | <i>embB2h</i>              | CGA ACA GCC CGA AGT GGT GC    |                                |                       |                     |
|                                       | embB3F                     | GGC TGA TGG GCG TCA TCT       | 63                             | 497                   | 16                  |
|                                       | embB3R                     | GGA CCA GCC GTT GGA GTA GGT C |                                |                       |                     |
|                                       | embB4F                     | CCC GAC CTA CTC CAA CGG C     | 66                             | 1195                  | 16                  |
|                                       | embB4R                     | TGG TGC ATA CCG AGC AGC AT    |                                |                       |                     |

|                          |        |                                |    |     |    |
|--------------------------|--------|--------------------------------|----|-----|----|
| <i>embR</i><br>(Rv1267c) | embR1F | CGA TCA CCA CAG CGG GCA GCA GC | 62 | 896 | 16 |
|                          | embR1R | GTT CGA ATG TCA GAG CCT CG     |    |     | 16 |
|                          | embR2F | CGA GGC TCT GAC ATT CGA AC     | 62 | 898 | 16 |
|                          | embR2R | GCC GAG ACT ATC AAC AAC GG     |    |     | 16 |

**TABLE S2** Oligonucleotide primers used in PCR and DNA sequencing

<sup>a</sup> In *italics* are primers encompassing the “hot spot” of the *embCAB* locus (EmbB codons 306, 406, and 497 and intergenic zone *embC-embA*)
